## PHYSIOLOGICAL RESPONSES OF KING PENGUINS DURING SIMULATED DIVING TO 136 m DEPTH

P. J. PONGANIS<sup>1,\*</sup>, G. L. KOOYMAN<sup>1</sup>, R. VAN DAM<sup>1</sup> AND Y. LEMAHO<sup>2</sup>

<sup>1</sup>Center for Marine Biotechnology and Biomedicine, Scripps Institution of Oceanography, University of California, San Diego, La Jolla, CA 92093-0204, USA and <sup>2</sup>Centre d'Ecologie et Physiologie Energetiques, Centre National de la Recherche Scientifique, 23 rue Becquerel, F-67087 Strasbourg, France

\*e-mail: pponganis@ucsd.edu

Accepted 21 July; published on WWW 30 September 1999

### Summary

To evaluate blood N<sub>2</sub> uptake and the role of the respiratory volume (air sacs/lungs) as a N<sub>2</sub> and O<sub>2</sub> reservoir in deep-diving penguins, diving respiratory volume (VDR), heart rate (*f*<sub>H</sub>), venous P<sub>N<sub>2</sub></sub>, blood volume (V<sub>b</sub>) and hemoglobin (Hb) concentration were measured in king penguins (*Aptenodytes patagonicus*) during forced submersions and compressions equivalent to depths up to 136 m. VDR was 69±18 ml kg<sup>-1</sup> (mean ± S.D.) in 62 submersions ranging from 4.4 atmospheres absolute (ATA; 1 ATA=101 kPa) (34 m) to 14.6 ATA (136 m). Submersion *f*<sub>H</sub> averaged 30±7 beats min<sup>-1</sup> (N=18), approximately 20 % of pre- and post-submersion values. Venous P<sub>N<sub>2</sub></sub> values during and after submersions as deep as 11.2 ATA (102 m) were all less than 2.8 atmospheres N<sub>2</sub> (283 kPa) above ambient pressure, a previously measured

threshold for symptomatic bubble formation. Mean V<sub>b</sub> was 83±8 ml kg<sup>-1</sup> (N=6); [Hb] was 17.6±0.7 g dl<sup>-1</sup> (N=7). On a mass-specific basis, mean VDR, and therefore total available N<sub>2</sub>, is 41 % of that in shallow-diving penguin species. Total body O<sub>2</sub> stores, calculated from measured VDR, V<sub>b</sub>, [Hb], muscle mass and myoglobin concentration, are 45 ml kg<sup>-1</sup>, with 23 % in the respiratory system. This small respiratory fraction in comparison with that in shallow-diving penguins suggests a lesser reliance on the respiratory oxygen store for extended breath-holding and also a reduced uptake of nitrogen at depth.

Key words: air sac, blood volume, dive, heart rate, haemoglobin, lung, N<sub>2</sub> stores, O<sub>2</sub> stores, pressure, king penguin, *Aptenodytes patagonicus*.

### Introduction

Deep dives of any bird or mammal are associated with potential blood absorption of nitrogen from the respiratory system and the attendant risks of decompression sickness and N<sub>2</sub> narcosis (Kooyman and Ponganis, 1998). In pinnipeds, N<sub>2</sub> uptake is minimized during diving because of small diving lung volumes, lung compression and the forcing of lung air into cartilage-reinforced upper airways (Denison and Kooyman, 1973; Kooyman et al., 1970). In contrast, the volume of the air sacs and lungs (the respiratory volume) in diving penguins represents a potentially significant reservoir of N<sub>2</sub> and O<sub>2</sub> (Kooyman et al., 1973; Kooyman and Ponganis, 1990). Mean diving respiratory volume of Adelie (*Pygoscelis adeliae*) and gentoo (*P. papua*) penguins is 165 ml kg<sup>-1</sup>, five times greater than that in pinnipeds (Kooyman et al., 1972, 1973). In addition, it has been stated that re-expansion of collapsed parabronchial air capillaries of birds would be highly unlikely if not impossible because of the sharp angles of curvature and high surface tension (Duncker, 1974). Therefore, lung compression does not appear to be a feasible mechanism for decreasing N<sub>2</sub> absorption in birds. Since arterial P<sub>N<sub>2</sub></sub> was elevated in Adelie and gentoo penguins during simulated dives to depth, it was suggested that they avoid the risk of elevated

P<sub>N<sub>2</sub></sub> by making short-duration, shallow dives (Kooyman et al., 1973).

King (*Aptenodytes patagonicus*) and emperor (*A. forsteri*) penguins, however, frequently make dives to depths of 200 and 400 m, respectively (Kooyman et al., 1992a; Kooyman and Kooyman, 1995). How such deep-diving penguins avoid significant N<sub>2</sub> uptake is unclear, but several possibilities exist. Severe bradycardia and reduction in cardiac output could reduce the cumulative uptake of N<sub>2</sub> during diving. In addition, a pressure-induced restriction of gas exchange might also occur. Histological examinations of the lungs of emperor and Humboldt (*Spheniscus humboldti*) penguins have demonstrated thickened blood-air barriers and increased blood capillary volumes (Welsch and Aschauer, 1986; Maina and King, 1987). It has been postulated that, at depth, engorgement of the blood capillaries might fill the parabronchial air capillaries, thereby preventing or reducing gas exchange (Kooyman et al., 1999). However, both these hypotheses for decreased N<sub>2</sub> absorption would also result in decreased O<sub>2</sub> uptake from the respiratory system, which, in smaller penguins, contains 45 % of the total O<sub>2</sub> store (Kooyman and Ponganis, 1998). Thus, either mechanism would deprive the

penguin of access to a significant portion of the body O<sub>2</sub> store. To evaluate these hypotheses and to assess the magnitude of O<sub>2</sub> stores in deep-diving penguins, we measured diving respiratory volume (*V<sub>DR</sub>*), heart rate (*f<sub>H</sub>*), venous *P<sub>N<sub>2</sub></sub>*, blood volume (*V<sub>b</sub>*) and hemoglobin (Hb) concentration in king penguins during forced submersions to simulated depths of up to 136 m.

### Materials and methods

Eight non-breeding adult king penguins (*Aptenodytes patagonicus* Gray), ranging in body mass from 9.5 to 13.1 kg, received brief training sessions (two sessions of five dives, of 1 to 4 min duration, over 2–3 h) in a pressure chamber at the biology laboratory on Ile de Possession, Crozet Archipelago, Antarctica. The submersion protocol and compression chamber were described by Kooyman et al. (1973). Compression and decompression rates were approximately equivalent to descent and ascent rates of 1 ms<sup>-1</sup>. All procedures were approved by the UCSD Animal Subjects Committee and conducted under an Antarctic Conservation Act permit.

Diving respiratory volume was calculated on the basis of the volume of water required to compress the bird in the chamber from 1 atmosphere absolute (ATA; 1 ATA=101 kPa) to the maximum pressure of a given submersion (Kooyman et al., 1973). Correction for the compliance of the chamber with the restraint jacket and board inside was included in the calculation. No correction was made for air trapped in the feathers.

Heart rate was calculated from analysis of electrocardiograms (ECGs) recorded using Smart Heart software (Harley Street Software, Canada) on a notebook computer. Prior to experiments, subcutaneous ECG leads (Kooyman et al., 1992b) were placed under local anesthesia (2% lidocaine) in free-standing, hooded birds. Pre-submersion, submersion and post-submersion *f<sub>H</sub>* values were calculated by summing heart beats for 1–2 min pre- and post-submersion and dividing by the duration of the analyzed ECG segment.

Venous blood samples were obtained from three birds during chamber experiments. Percutaneous catheters (20 g, 1.1 mm outer diameter) were inserted into the wing veins of two birds and the femoral vein of one bird. The catheters extended 10–15 cm from the skin into the veins, and the catheter tips were probably near the proximal portion of the inferior vena cava. General anesthesia (isoflurane; Kooyman et al., 1992b) was administered for catheter placement; 4 h of recovery was allowed prior to experiments. Blood samples were analyzed for N<sub>2</sub> content using the Van Slyke technique for 1 ml samples of whole blood (Kooyman et al., 1973). As a control, N<sub>2</sub> contents of distilled water samples were within 3% of published values (Altman and Dittmer, 1971). At the end of experiments, catheters and electrodes were removed under general or local anesthesia.

Plasma volume (*V<sub>p</sub>*) was determined using the Evan's Blue dye technique (Castellini et al., 1987) in six birds, three from

the chamber experiments and three additional birds. In the latter, catheterization was similar to that described above. Dye injection and sampling were conducted in four birds while they were awake and in two birds under general anesthesia. Hematocrit (Hct) was determined by microcentrifugation and [Hb] using a cyanmethemoglobin technique (Ames Mini-Pak Hb) in these six birds and one other bird. Blood volume was calculated as  $V_p/(1-Hct)$ .

Brain volume was estimated by measuring the cranial volume of six adult king penguin skulls found in the colony by filling the cranium with sand, weighing the sand, and dividing that value by the measured density of the sand.

Values are expressed as mean ± s.d. Analysis of variance and Tukey comparison of means were conducted using Statistica (Statsoft). Differences were assumed to be significant at  $P<0.05$ .

### Results

Diving respiratory volume was determined for 62 submersions, ranging from 4.4 ATA (34 m) to 14.6 ATA (136 m). Mean *V<sub>DR</sub>* was 69±18 ml kg<sup>-1</sup>. The range of the mean *V<sub>DR</sub>* values of the eight individual birds was 44–88 ml kg<sup>-1</sup>.

Pre- and post-submersion *f<sub>H</sub>* values for 18 submersions of six birds averaged 141±32 and 150±38 beats min<sup>-1</sup>, respectively. Mean submersion *f<sub>H</sub>* was 30±7 beats min<sup>-1</sup>, significantly less than pre- and post-submersion *f<sub>H</sub>* values. The durations of these submersions ranged from 2.5 to 5 min.

Mean venous N<sub>2</sub> content at surface ambient pressure, i.e. 1 ATA, was 1.12±0.08 vol% ( $N=9$ ). As in prior studies (Kooyman et al., 1972, 1973), this N<sub>2</sub> content was assumed to be equivalent to a *P<sub>N<sub>2</sub></sub>* of 0.79 atmospheres (1 atmosphere=101 kPa). Three venous blood samples obtained after less than 0.5 min at 4.4 ATA averaged 1.14±0.27 atmospheres N<sub>2</sub>. The mean of four samples collected between 0.3 and 1.1 min at 7.8 ATA was 1.93±0.70 atmospheres N<sub>2</sub>. Two samples obtained after 0.3 and 1.1 min at 11.2 ATA were 1.50 and 2.21 atmospheres N<sub>2</sub>, respectively. Two post-submersion samples (2.63 and 1.44 atmospheres N<sub>2</sub>) were collected 10 and 40 s after submersions to 7.8 ATA.

Mean *V<sub>p</sub>* and *V<sub>b</sub>* of six birds were 46±4 ml kg<sup>-1</sup> and 83±8 ml kg<sup>-1</sup>, respectively. The body mass of these birds was 11.7±1.2 kg. Mean [Hb] and Hct in seven penguins were 17.6±0.7 g dl<sup>-1</sup> and 45±2% respectively. There were no significant differences in *V<sub>p</sub>* or Hct between anesthetized and awake birds.

The cranial volume of six skulls was 28±2 ml. This is considered to be a maximum estimate of brain volume.

### Discussion

The air volumes measured in these experiments include any plumage air in addition to the *V<sub>DR</sub>*. Plumage volumes under these conditions are probably less than in the unrestrained situation because restrained birds are unable to preen. Past

experiments (Kooyman et al., 1973) demonstrated that plumage air of Adelie penguins under these conditions was not more than 10% of the total air volume measured (or approximately  $15 \text{ ml kg}^{-1}$ ). Thus, the actual VDR of these king penguins during forced submersions is probably less than  $69 \text{ ml kg}^{-1}$ . Offsetting this lower value is the possibility that the VDR would be greater during unrestrained conditions, as it is in the lesser scaup *Aythya affinis* (Stephenson, 1995). Nonetheless, it is notable that, under similar experimental protocols, the mass-specific VDR in king penguins is 41% of that of gentoo and Adelie penguins. This represents a significantly smaller potential  $\text{N}_2$  and  $\text{O}_2$  reservoir in king penguins.

It is not known whether pulmonary gas exchange continues in penguins regardless of depth during dives. However, if gas exchange is not restricted, the maximum available respiratory  $\text{N}_2$  in a typical 12 kg king penguin is approximately 700 ml, assuming a VDR of  $69 \text{ ml kg}^{-1}$  and a respiratory  $\text{N}_2$  fraction of 0.9 (Kooyman et al., 1973). If dives were deep enough and long enough, and if all this  $\text{N}_2$  were absorbed and distributed in the total body water of a 12 kg king penguin, the blood  $P_{\text{N}_2}$  could theoretically reach approximately 290 kPa or 2.9 atmospheres (for assumptions and calculations, see Kooyman and Ponganis, 1990). This  $P_{\text{N}_2}$  is 38% of the value that would result if the mass-specific VDR of Adelie and gentoo penguins were used in the calculations. It is also below the threshold for symptomatic bubble formation in cats (Harvey et al., 1944). At the opposite theoretical extreme, blood  $P_{\text{N}_2}$  could be greater than 4700 kPa (47 atmospheres) in a king penguin if this maximum  $\text{N}_2$  gas volume were completely absorbed but limited by restricted peripheral blood flow to distribution to the blood volume (1 l), heart tissue (84 ml; Drabek, 1988) and brain (28 ml).

Although maximum arterial  $P_{\text{N}_2}$  during diving potentially equals that in the parabronchial airways (in the absence of a shunt or restricted gas exchange), the total volume of  $\text{N}_2$  absorbed will also be a function of the magnitude and distribution of cardiac output during a submersion. In these experiments,  $f_{\text{H}}$  profiles were characteristic of forced submersion responses (Scholander, 1940). Mean  $f_{\text{H}}$  during the entire submersion period was  $30 \text{ beats min}^{-1}$ , approximately 50% of that recorded in free-diving emperor penguins (Kooyman et al., 1992b). Presumably, cardiac output was correspondingly reduced in the king penguins, and blood flow was predominantly restricted to the brain, heart and lungs. In this situation, although the arterial  $P_{\text{N}_2}$  would be maximized, the total amount of  $\text{N}_2$  absorbed would be limited by the low pulmonary flow and the small volume of distribution. During periods of decreasing pressure (i.e. during ascent and surface tachycardias), increased flow, increased volume of distribution (i.e. splanchnic organs and muscle not saturated with  $\text{N}_2$  as a result of prior vasoconstriction) and  $\text{N}_2$  exchange into the respiratory system should decrease blood  $P_{\text{N}_2}$ . The low venous  $P_{\text{N}_2}$  values during and after submersions are consistent with this model of low  $\text{N}_2$  uptake and subsequent redistribution of  $\text{N}_2$ . No blood  $P_{\text{N}_2}$  values were greater than 2.8 atmospheres above ambient pressure, the threshold for symptomatic bubble

formation in cats (Harvey et al., 1944). This model is also supported by the prior data of Kooyman et al. (1973), in which arterial  $P_{\text{N}_2}$  decreased significantly in blood samples obtained after decompression but prior to the first breath after simulated dives of Adelie penguins. Thus, in the absence of restricted pulmonary gas exchange at depth, possible roles of a bradycardia during diving and a tachycardia during ascent may be (1) to limit cumulative uptake of  $\text{N}_2$  and (2) later to maximize its distribution during periods of decreasing pressure.

Our venous  $P_{\text{N}_2}$  data do not allow complete evaluation of the possible restriction of gas exchange in king penguins at depth by the hypothesized engorgement of parabronchial blood capillaries. A similar mechanism of blood capillary volume expansion presumably prevents 'lung squeeze' in humans diving to depths at which lung volume would be compressed below residual volume (Craig, 1968). Future studies of peak arterial  $P_{\text{N}_2}$  are still required to evaluate this possibility in penguins. Our venous  $P_{\text{N}_2}$  data are consistent with this model, but may not reflect peak arterial values during submersion because of venous admixture and tissue  $\text{N}_2$  uptake.

The relatively small VDR of king penguins also affects the distribution of  $\text{O}_2$  stores. The VDR,  $V_{\text{b}}$  and [Hb] data from this study, previous muscle mass and myoglobin determinations (Cherel et al., 1993; Baldwin et al., 1984) and the  $\text{O}_2$  saturation and extraction assumptions used in past calculations (Kooyman and Ponganis, 1990) allow the most accurate available estimation of  $\text{O}_2$  stores for any penguin. These data yield a total body  $\text{O}_2$  store of  $45 \text{ ml kg}^{-1}$ , with 23% in the respiratory system, 30% in the blood and 47% in muscle. This respiratory  $\text{O}_2$  store is smaller than prior estimations for king penguins and is 50% less than the value in smaller penguins (Kooyman and Ponganis, 1998). It is similar to that in otariid pinnipeds (Kooyman, 1989). The resulting greater  $\text{O}_2$  distribution in blood and muscle of king penguins makes reliance on respiratory  $\text{O}_2$  stores less critical during diving. This is advantageous if blood  $\text{N}_2$  uptake and also  $\text{O}_2$  uptake are limited during deep dives. It is also notable that the Hb concentrations and mass-specific blood volumes of king penguins and emperor penguins (Ponganis et al., 1997) are in the same range as those of Adelie penguins (Lenfant et al., 1969). Therefore, the results of the present study indicate that king penguins have adapted to deep diving by (1) a reduction in respiratory  $\text{O}_2$  stores, (2) a relative increase in muscle  $\text{O}_2$  stores, and (3) a reduction in respiratory  $\text{N}_2$  uptake, possibly secondary to either reduced cardiac output or a pressure-induced restriction of pulmonary gas exchange. Similar adaptations also probably function in emperor penguins, which display diving patterns similar to those of king penguins, but of nearly twice the depth and duration.

We thank our research colleagues and the staff at the research station on Ile de Possession and the crews of the *Marion Dufresne* and *La Curieuse* for their support. This research was supported by NSF grant OPP 92-19872.

## References

- Altman, D. C. and Dittmer, D. S.** (1971). *Respiration and Circulation*. Bethesda: FASEB. 471pp.
- Baldwin, J., Hardel, J.-P., Montague, T. and Tomkin, R.** (1984). Energy metabolism in penguin swimming muscles. *Mol. Physiol.* **6**, 33–42.
- Castellini, M. A., Costa, D. P. and Huntley, A.** (1987). Fatty acid metabolism in fasting elephant seal pups. *J. Comp. Physiol. B* **157**, 445–448.
- Cherel, Y., Charassin, J.-B. and Handrich, Y.** (1993). Comparison of body reserve buildup in prefasting chicks and adults of king penguins (*Aptenodytes patagonicus*). *Physiol. Zool.* **66**, 750–770.
- Craig, A. B., Jr** (1968). Depth limits of breath hold diving. *Respir. Physiol.* **5**, 14–22.
- Drabek, C. M.** (1988). Heart and ventricle weights of Antarctic penguins. *Can. J. Zool.* **67**, 2602–2604.
- Denison, D. M. and Kooyman, G. L.** (1973). The structure and function of the small airways in pinniped and sea otter lungs. *Respir. Physiol.* **17**, 1–10.
- Duncker, H.-R.** (1974). Structure of the avian respiratory tract. *Respir. Physiol.* **22**, 1–19.
- Harvey, E. N., McElroy, W. D., Whiteley, A. H., Warren, G. H. and Pease, D. C.** (1944). Bubble formation in animals. III. An analysis of gas tension and hydrostatic pressure in cats. *J. Cell. Comp. Physiol.* **24**, 117–132.
- Kooyman, G. L.** (1989). *Diverse Divers*. Berlin: Springer-Verlag. 200pp.
- Kooyman, G. L., Cherel, Y., LeMaho, Y., Croxall, J. P., Thorson, P. H., Ridoux, V. and Kooyman, C. A.** (1992a). Diving behavior and energetics during foraging cycles in king penguins. *Ecol. Monogr.* **62**, 143–163.
- Kooyman, G. L. and Kooyman, T. G.** (1995). Diving behavior of emperor penguins nurturing chicks at Coulman Island. *Condor* **97**, 536–549.
- Kooyman, G. L. and Ponganis, P. J.** (1990). Behavior and physiology of diving in emperor and king penguins. In *Penguin Biology* (ed. L. S. Davis and J. T. Darby), pp. 229–242. San Diego: Academic Press.
- Kooyman, G. L. and Ponganis, P. J.** (1998). The physiological basis of diving to depth: birds and mammals. *Annu. Rev. Physiol.* **60**, 19–33.
- Kooyman, G. L., Ponganis, P. J., Castellini, M. A., Ponganis, E. P., Ponganis, K. V., Thorson, P. H., Eckert, S. A. and LeMaho, Y.** (1992b). Heart rates and swim speeds of emperor penguins diving under sea ice. *J. Exp. Biol.* **165**, 161–180.
- Kooyman, G. L., Ponganis, P. J. and Howard, R. S.** (1999). Diving animals. In *The Lung at Depth*, chapter 14 (ed. C. Lundgren and C. Miller), pp. 587–620. New York: Marcel Dekker.
- Kooyman, G. L., Schroeder, J. P., Denison, D. M., Hammond, D. D., Wright, J. J. and Bergman, W. P.** (1972). Blood N<sub>2</sub> tensions of seals during simulated deep dives. *Am. J. Physiol.* **223**, 1016–1020.
- Kooyman, G. L., Schroeder, J. P., Greene, D. G. and Smith, V. A.** (1973). Gas exchange in penguins during simulated dives to 30 and 68 m. *Am. J. Physiol.* **225**, 1467–1471.
- Lenfant, C., Kooyman, G. L., Elsner, R. and Drabek, C. M.** (1969). Respiratory function of the blood of the Adelie penguin *Pygoscelis adeliae*. *Am. J. Physiol.* **216**, 1598–1600.
- Maina, J. N. and King, A. S.** (1987). A morphometric study of the lung of the Humboldt penguin (*Spheniscus humboldti*). *Anat. Histol. Embryol.* **16**, 293–297.
- Ponganis, P. J., Costello, M. L., Starke, L. N., Mathieu-Costello, O. and Kooyman, G. L.** (1997). Structural and biochemical characteristics of locomotory muscles of emperor penguins, *Aptenodytes forsteri*. *Respir. Physiol.* **109**, 73–80.
- Scholander, P. F.** (1940). Experimental investigations on the respiratory function in diving mammals and birds. *Hvalradets Skr. Nor. Vidensk. Akad Oslo* **22**, 1–131.
- Stephenson, R.** (1995). Respiratory and plumage gas volumes in unrestrained diving ducks (*Aythya affinis*). *Respir. Physiol.* **100**, 129–137.
- Welsch, U. and Aschauer, B.** (1986). Ultrastructural observations on the lung of the emperor penguin (*Aptenodytes forsteri*). *Cell Tissue Res.* **243**, 137–144.
